# Supplementary material
Source: ML conference proceedings conference paper supplement (https://proceedings.mlr.press/v48/qua16.html)
Supplement: Supplementary file 1 [file qua16-supp.pdf]

# Supplementary Material of Fast Rate Analysis of Some Stochastic Optimization Algorithms

The following two lemmas are Lemma 3 and Lemma 4 in [1], we present here for completeness.

**Lemma A. 1.** *Suppose  $X_1, \dots, X_T$  is a martingale difference sequence with  $|X_t| \leq b$ . Let*

$$\text{Var}_t X_t = \text{Var}(X_t | X_1, \dots, X_{t-1}).$$

*Let  $V = \sum_{t=1}^T \text{Var}_t X_t$  be the sum of conditional variance of  $X_t$ 's. Further, let  $\sigma = \sqrt{V}$ . Then we have for any  $\delta < 1/e$  and  $T \geq 3$ ,*

$$\text{Prob}\left(\sum_{t=1}^T X_t > \max\{2\sigma, 3b\sqrt{\ln(1/\delta)}\}\sqrt{\ln(1/\delta)}\right) \leq 4\ln(T)\delta$$

**Lemma A. 2.** *Suppose  $s, r, d, b, \Delta \geq 0$  and we have*

$$s - r \leq \max\{4\sqrt{ds}, 6b\Delta\}\Delta.$$

*Then, it follows that*

$$s \leq r + 4\sqrt{dr}\Delta + \max\{16d, 6b\}\Delta^2.$$

## Regularized Dual Averaging Method

Now we begin the proof of convergence rate of RDA. We define the following conjugate type function used in the proof.

$$V_t(s) = \max_w [\langle s, w - w_0 \rangle - \text{tr}(w) - \gamma \sum_{\tau=1}^t \|w_\tau - w\|_2^2 - \beta_t h(w)]$$

**Lemma A. 3.** *The function  $V_t(\cdot)$  is convex and differentiable.  $\nabla V(s_t) = w_{t+1} - w_0$ , where  $s_t = \sum_{\tau=1}^t f'(w_\tau, z_\tau)$ . The gradient is Lipschitz continuous with constant  $\frac{1}{2\gamma t + \beta_t}$ , which is*

$$\|\nabla V_t(s_1) - \nabla V_t(s_2)\|_2 \leq \frac{1}{2\gamma t + \beta_t} \|s_1 - s_2\|_2,$$

*Proof.* Because  $\gamma \sum_{\tau=1}^t \|w_\tau - w\|_2^2 + \beta_t h(w)$  is strongly convex with convexity parameter  $2\gamma t + \beta_t$ . It is a direct result from theorem 1 in [2].  $\square$

A property of  $V_t(\cdot)$  with Lipschitz continuous gradient is

$$V_t(s + \delta) \leq V_t(s) + \langle \delta, \nabla V_t(s) \rangle + \frac{1}{2(2\gamma t + \beta_t)} \|\delta\|_2^2$$

We refer to [2] for more details.

**Proof of Lemma 3.**

$$\begin{aligned} & \text{Reg}_t - \gamma \sum_{\tau=1}^t \|w_\tau - w\|_2^2 \\ & \leq \sum_{\tau=1}^t \langle f'(w_\tau, z_\tau), w_\tau - w \rangle + \sum_{\tau=1}^t r(w_\tau) - tr(w) - \gamma \sum_{\tau=1}^t \|w_\tau - w\|_2^2 \\ & = \sum_{\tau=1}^t \langle f'(w_\tau, z_\tau), w_\tau - w_0 \rangle + \sum_{\tau=1}^t r(w_\tau) - tr(w) - \gamma \sum_{\tau=1}^t \|w_\tau - w\|_2^2 \\ & \quad + \sum_{\tau=1}^t \langle f'(w_\tau, z_\tau), w_0 - w \rangle \end{aligned} \tag{1}$$

where the first inequity holds from the convexity of  $f(\cdot, z)$ .

Before we bound above terms, we relate  $V_{t-1}(-s_t)$  and  $V_t(-s_t)$  in the following way

$$\begin{aligned} V_{t-1}(-s_t) &= \max_w [\langle -s_t, w - w_0 \rangle - (t-1)r(w) - \gamma \sum_{\tau=1}^{t-1} \|w_\tau - w\|_2^2 - \beta_{t-1}h(w)] \\ &\geq \langle -s_t, w_{t+1} - w_0 \rangle - (t-1)r(w_{t+1}) - \gamma \sum_{\tau=1}^{t-1} \|w_\tau - w_{t+1}\|_2^2 - \beta_{t-1}h(w_{t+1}) \\ &= \langle -s_t, w_{t+1} - w_0 \rangle - tr(w_{t+1}) - \gamma \sum_{\tau=1}^t \|w_\tau - w_{t+1}\|_2^2 - \beta_t h(w_{t+1}) + r(w_{t+1}) \\ &\quad + \gamma \|w_t - w_{t+1}\|_2^2 - (\beta_{t-1} - \beta_t)h(w_{t+1}) \end{aligned} \tag{2}$$

Notice the summation of first four terms is  $V_t(-s_t)$ .

When  $t > 1$ , since  $\beta_t$  is an increasing sequence, we have

$$V_t(-s_t) + r(w_{t+1}) + \gamma \|w_t - w_{t+1}\|_2^2 \leq V_{t-1}(-s_t)$$

We then upper bound  $V_{t-1}(-s_t)$

$$\begin{aligned} V_{t-1}(-s_t) &= V_{t-1}(-s_{t-1} - f'(w_t, z_t)) \\ &\leq V_{t-1}(-s_{t-1}) - \langle \nabla V_{t-1}(-s_{t-1}), f'(w_t, z_t) \rangle + \frac{1}{2(2\gamma(t-1) + \beta_{t-1})} \|f'(w_t, z_t)\|_2^2, \end{aligned} \tag{3}$$

where the inequality holds from the property of Lipschitz continuous of  $\nabla V_t(\cdot)$ .

Now we have

$$\begin{aligned}
V_t(-s_t) - V_{t-1}(-s_{t-1}) &\leq -\langle \nabla V_{t-1}(s_{t-1}), f'(w_t, z_t) \rangle + \frac{1}{2(2\gamma(t-1) + \beta_{t-1})} \|f'(w_t, z_t)\|_2^2 \\
&\quad - r(w_{t+1}) - \gamma \|w_t - w_{t+1}\|_2^2 \\
&\leq -\langle w_t - w_0, f'(w_t, z_t) \rangle + \frac{1}{2(2\gamma(t-1) + \beta_{t-1})} \|f'(w_t, z_t)\|_2^2 \\
&\quad - r(w_{t+1}),
\end{aligned} \tag{4}$$

where the second inequality uses the fact  $\nabla V(s_t) = w_{t+1} - w_0$  from Lemma A.3

When  $t = 1$ , we have

$$V_1(-s_1) - 0 \leq -\langle w_1 - w_0, f'(w_1, z_1) \rangle + \frac{\|f'(w_1, z_1)\|_2^2}{2\beta_0} - r(w_2) + (\beta_0 - \beta_1)h(w_2). \tag{5}$$

Sum both sides of  $V_\tau(s_\tau)$  from  $\tau = 1$  to  $t$ , we have

$$V_t(-s_t) \leq -\sum_{\tau=1}^t \langle w_\tau - w_0, f'(w_\tau, z_\tau) \rangle + \sum_{\tau=1}^t \frac{\|f'(w_\tau, z_\tau)\|_2^2}{2(2\gamma(\tau-1) + \beta_{\tau-1})} - \sum_{\tau=2}^{t+1} r(w_\tau) + (\beta_0 - \beta_1)h(w_2).$$

We then bound  $Reg_t - \gamma \sum_{\tau=1}^t \|w_\tau - w\|_2^2$  for all  $w \in \mathcal{F}_D$  using above result,

$$\begin{aligned}
Reg_t - \gamma \sum_{\tau=1}^t \|w_\tau - w\|_2^2 &\leq \sum_{\tau=1}^t r(w_\tau) + \sum_{\tau=1}^t \langle f'(w_\tau, z_\tau), w_\tau - w_0 \rangle + \max_{w \in \mathcal{F}_D} [\langle -s_t, w - w_0 \rangle - tr(w) \\
&\quad - \gamma \sum_{\tau=1}^t \|w_\tau - w\|_2^2] \\
&\leq \sum_{\tau=1}^t r(w_\tau) + \sum_{\tau=1}^t \langle f'(w_\tau, z_\tau), w_\tau - w_0 \rangle + V_t(-s_t) + \beta_t D^2 \\
&\leq r(w_1) - r(w_{t+1}) + (\beta_0 - \beta_1)h(w_2) + \sum_{\tau=1}^t \frac{\|f'(w_\tau, z_\tau)\|_2^2}{2(2\gamma(\tau-1) + \beta_{\tau-1})} \\
&\quad + \beta_t D^2,
\end{aligned} \tag{6}$$

where the second inequality holds from the fact that

$$\max_{w \in \mathcal{F}_D} [\langle s_t, w - w_0 \rangle - tr(w) - \gamma \sum_{\tau=1}^t \|w_\tau - w\|_2^2] \leq V_t(-s_t) + \beta_t D^2.$$

Since  $\arg \min_w h(w) = \arg \min_w r(w)$  and  $w_1 = \arg \min h(w)$ ,  $r(w_1) - r(w_{t+1}) \leq 0$ . We set  $\beta_0 = \beta_1 = \gamma$  and  $\beta_t = \gamma(1 + \ln t)$ , then we have

$$Reg_T - \gamma \sum_{t=1}^T \|w_t - w\|_2^2 \leq \gamma D^2 (1 + \ln(T)) + \sum_{t=1}^T \frac{L^2}{2\gamma(2t-1 + \ln t)} \leq (C_1 \gamma D^2 + \frac{C_2 L^2}{\gamma})(1 + \ln T).$$

□

**Proof of Theorem 2.** Since we have already known  $Reg_T - \gamma \sum_{t=1}^T \|w_t - w\|_2^2 \leq C_1 \ln T + C_2$ , using similar steps in the proof of Theorem 1, we have,

$$\frac{1}{2} Diff_T \leq \sum_{t=1}^T \xi_t + C_1 \ln T + C_2.$$

Then we apply Lemma 2, Lemma A.1 and Lemma A.2 to get the result.  $\square$

## OPG-ADMM

The following Lemma is extracted from Theorem 4 in the appendix of [3].

**Lemma A. 4.** Let  $\{x_t\}_{t=1}^T$ ,  $\{y_t\}_{t=1}^T$  and  $\{\lambda_t\}_{t=1}^T$  be the sequence generated by the algorithm. For all  $\hat{x} \in \mathcal{X}$ ,  $\hat{y} \in \mathcal{Y}$  and  $\hat{\lambda} \in R^l$  and  $f$  is weakly convex, we have

$$\begin{aligned} & \sum_{t=1}^T (f(x_t, z_t) + \psi(y_t)) - \sum_{t=1}^T (f(\hat{x}, z_t) + \psi(\hat{y})) + \sum_{t=1}^T \begin{pmatrix} -A^T \tilde{\lambda}_t \\ -B^T \tilde{\lambda}_t \\ Ax_t + By_t - b \end{pmatrix}^T \begin{pmatrix} x_t - \hat{x} \\ y_t - \hat{y} \\ \tilde{\lambda}_t - \hat{\lambda} \end{pmatrix} \\ & + \sum_{t=1}^T \frac{\|\lambda_t - \lambda_{t+1}\|_2^2}{2\rho} + \frac{\|\lambda_{T+1} - \hat{\lambda}\|_2^2}{2\rho} \\ & \leq \frac{\|\hat{x}\|_{G_1}^2}{2\eta_1} + \sum_{t=2}^T \left( \frac{\gamma}{2\eta_t} - \frac{\gamma}{2\eta_{t-1}} \right) \|x_t - \hat{x}\|_2^2 + \sum_{t=1}^T \frac{\eta_t}{2} \|g_t\|_{G_t^{-1}}^2 + \frac{\rho}{2} \|b - B\hat{y}\|_2^2 \\ & + \frac{\|\hat{\lambda}\|_2^2}{2\rho} + \langle Ax_{T+1}, \hat{\lambda} \rangle + \langle B(\hat{y} - y_{T+1}), \lambda_{T+1} - \hat{\lambda} \rangle - \langle B\hat{y} - b, \hat{\lambda} \rangle, \end{aligned} \tag{7}$$

where  $g_t$  denotes  $f'(x_t, z_t)$  for short.

**Proof of Lemma 4.** We subtract  $\sum_{t=1}^T \frac{\beta}{4} \|x_t - \hat{x}\|_2^2$  at both side of Lemma A.4. Notice  $\langle \hat{y} - y_{T+1}, B^T(\lambda_{T+1} - \hat{\lambda}) \rangle \leq \langle \hat{y} - y_{T+1}, \nabla \psi(y_{T+1}) - B^T \hat{\lambda} \rangle$  using the optimality of  $y_{t+1}$  in the algorithm, i.e.,  $\langle \nabla \psi(y_t) - B^T \lambda_t, y - y_t \rangle \geq 0$ . So this term can also be bounded if  $\hat{\lambda}$  is bounded, in particular we choose  $\hat{\lambda} = 0$ .

Notice  $G_t \succeq I$  in the algorithm by choosing  $\gamma, \rho, \eta_t$ . Similar to the proof of Lemma 1, the term  $\sum_{t=2}^T \left( \frac{\gamma}{2\eta_t} - \frac{\gamma}{2\eta_{t-1}} \right) \|x_t - \hat{x}\|_2^2 + \sum_{t=1}^T \frac{\eta_t}{2} \|g_t\|_{G_t^{-1}}^2 - \sum_{t=1}^T \frac{\beta}{4} \|x_t - \hat{x}\|_2^2$  is bounded by  $C_1 \ln T + C_2$ , if we choose  $\eta_t = \frac{2\gamma}{\beta t}$ .

We choose  $\hat{\lambda} = 0$  to simplify the left hand side. For all  $\hat{x}, \hat{y}$  such that  $A\hat{x} + B\hat{y} = b$ , we have

$$\begin{aligned}
\sum_{t=1}^T \begin{pmatrix} -A^T \tilde{\lambda}_t \\ -B^T \tilde{\lambda}_t \\ Ax_t + By_t - b \end{pmatrix}^T \begin{pmatrix} x_t - \hat{x} \\ y_t - \hat{y} \\ \tilde{\lambda}_t - \hat{\lambda} \end{pmatrix} &= \sum_{t=1}^T \begin{pmatrix} A^T \hat{\lambda} \\ B^T \hat{\lambda} \\ A\hat{x} + B\hat{y} - b \end{pmatrix}^T \begin{pmatrix} \hat{x} - x_t \\ \hat{y} - y_t \\ \tilde{\lambda}_t - \hat{\lambda} \end{pmatrix} \\
&= \sum_{t=1}^T \langle \hat{\lambda}, A(\hat{x} - x_t) + B(\hat{y} - y_t) \rangle \\
&= \sum_{t=1}^T \langle \hat{\lambda}, b - Ax_t - By_t \rangle \\
&= \sum_{t=1}^T \langle \hat{\lambda}, (\lambda_t - \lambda_{t-1}) \rangle \\
&= \left\langle \frac{1}{\rho} \hat{\lambda}, \lambda_T - \lambda_1 \right\rangle,
\end{aligned} \tag{8}$$

where last two equality hold from the fact that  $b - Ax_t - By_t = \frac{\lambda_t - \lambda_{t-1}}{\rho}$  and  $Ax_1 + By_1 - b = 0$ .

We set  $\hat{\lambda} = 0$ , so the third term on the left side in Lemma 4 is 0.

Also notice  $\frac{\|\hat{x}\|_{G_1}^2}{2\eta_1}$  and  $\frac{\rho}{2}\|b - B\hat{y}\|_2^2$  are bounded under our assumption. Thus the RHS of the Lemma 4 is bounded by  $C_1 \ln T + C_2$  when  $\hat{\lambda} = 0$ .  $\square$

Similar to the previous proof, we define

$$Diff = \sum_{t=1}^T (F(x_t) + \psi(y_t)) - \sum_{t=1}^T (F(x^*) + \psi(y^*))$$

and

$$Reg = \sum_{t=1}^T (f(x_t, z_t) + \psi(y_t)) - \sum_{t=1}^T (f(x^*, z_t) + \psi(y^*)),$$

where  $F(x) = Ef(x, z)$ ,  $G(x, y) = F(x) + \psi(y)$ . Remind that  $Ax_t + By_t - b \neq 0$  in general, thus we use  $y'_t = B^{-1}(b - Ax_t)$  as an estimator of  $y$  at the  $t$ -th step.

**Proof of Theorem 3.** Similar to the previous proof in OPG, we define

$$\begin{aligned}
\xi_t &= F(x_t) + \psi(y_t) - F(x^*) - r(y^*) - (f(x_t, z_t) + r(y_t) - f(x^*, z_t) - \psi(y^*)) \\
&= F(x_t) - F(x^*) - (f(x_t, z_t) - f(x^*, z_t)).
\end{aligned} \tag{9}$$

$\xi_t$  is a martingale difference, since  $x_t$  just depends on the data from time step  $1, \dots, t-1$ ,  $E_{t-1}f(x^*, z_t) = F(x^*)$ ,  $E_{t-1}f(x_t, z_t) = F(x_t)$ . Using Lemma 2,  $Var_{t-1}\xi_t = E_{t-1}\xi_t^2 \leq L^2\|x_t - x^*\|_2^2$ .

Next we relate  $Diff$  to  $\sum_{t=1}^T Var_{t-1}\xi_t$ .

$$\begin{aligned}
Diff &\geq \sum_{t=1}^T \langle \nabla F(x^*), x_t - x^* \rangle + \frac{\beta}{2} \|x_t - x^*\|_2^2 + \langle \nabla \psi(y^*), y_t - y^* \rangle \\
&= \sum_{t=1}^T [\langle \nabla F(x^*), x_t - x^* \rangle + \langle \nabla \psi(y^*), y'_t - y^* \rangle + \langle \nabla \psi(y^*), y_t - y'_t \rangle + \frac{\beta}{2} \|x_t - x^*\|_2^2],
\end{aligned} \tag{10}$$

where the first inequality holds from the convexity of  $F$  and  $\psi$ .

Recall that  $y'_t = B^{-1}(b - Ax_t)$  and  $Ax^* + By^* - b = 0$ , so  $\langle \nabla F(x^*), x_t - x^* \rangle + \langle \nabla \psi(y^*), y'_t - y^* \rangle \geq 0$  using the optimality of  $(x^*, y^*)$ . Thus we have the following relation.

$$Diff + \frac{1}{\rho} \langle B^{-T} \nabla \psi(y^*), \lambda_T - \lambda_1 \rangle = Diff + \sum_{t=1}^T \langle \nabla \psi(y^*), y'_t - y_t \rangle \geq \sum_{t=1}^T \frac{\beta}{2} \|x_t - x^*\|_2^2, \tag{11}$$

where the first equality holds from the fact that  $B(y'_t - y_t) = b - Ax_t - By_t = \frac{\lambda_t - \lambda_{t-1}}{\rho}$  and  $Ax_1 + By_1 - b = 0$ .

We denote  $\frac{1}{\rho} \langle B^{-T} \nabla \psi(y^*), \lambda_T - \lambda_1 \rangle$  as  $N_T$ , and discuss two conditions.

When  $N_T \leq 0$ , we have  $Diff \geq \sum_{t=1}^T \frac{\beta}{2} \|x_t - x^*\|_2^2$ .

When  $N_T \geq 0$ , we need an upper bound of  $N_T$ .

$$\begin{aligned}
N_T &= \frac{1}{\rho} \langle B^{-T} \nabla \psi(y^*), \lambda_T - \lambda_1 \rangle \\
&\leq \frac{3}{2\rho} \|B^{-T} \nabla \psi(y^*)\|_2^2 + \frac{1}{6\rho} \|\lambda_T - \lambda_1\|_2^2 \\
&= \frac{3}{2\rho} \|B^{-T} \nabla \psi(y^*)\|_2^2 + \frac{1}{6\rho} \|\lambda_T - \lambda_{T+1} + \lambda_{T+1} - \lambda_1\|_2^2 \\
&\leq \frac{3}{2\rho} \|B^{-T} \nabla \psi(y^*)\|_2^2 + \frac{1}{2\rho} (\|\lambda_T - \lambda_{T+1}\|_2^2 + \|\lambda_{T+1} - \lambda_1\|_2^2),
\end{aligned} \tag{12}$$

where the first and second inequalities hold from the Cauchy-Schwarz inequality. Notice  $\frac{3}{2\rho} \|B^{-T} \nabla \psi(y^*)\|_2^2$  can be bounded by our assumption.

Remind that instead of evaluating  $F(\bar{x}_T) + \psi(\bar{y}_T) - F(x^*) - \psi(y^*)$ , our aim is to bound  $F(\bar{x}_T) + \psi(\bar{y}'_T) - F(x^*) - \psi(y^*)$ .

$$\begin{aligned}
T(F(\bar{x}_T) + \psi(\bar{y}'_T) - F(x^*) - \psi(y^*)) &\leq T(F(\bar{x}_T) + \psi(\bar{y}_T) - F(x^*) - \psi(y^*)) \\
&\quad + T\langle \nabla \psi(\bar{y}'_T), \bar{y}'_T - \bar{y}_T \rangle \\
&\leq Diff + T\langle B^{-T} \nabla \psi(\bar{y}'_T), B(\bar{y}'_T - \bar{y}_T) \rangle \\
&= Diff + \frac{1}{\rho} \langle B^{-T} \nabla \psi(\bar{y}'_T), \lambda_T - \lambda_1 \rangle,
\end{aligned} \tag{13}$$

where the first inequality holds from the convexity of  $\psi$ , the second inequality uses the convexity of  $F$  and  $\psi$ , and the last equality holds from the fact  $B(y'_t - y_t) = b - Ax_t - By_t = \frac{\lambda_t - \lambda_{t-1}}{\rho}$  and  $Ax_1 + By_1 - b = 0$ .

We also need to consider two cases, i.e.,  $\langle B^{-T}\nabla\psi(\bar{y}'_T), \lambda_T - \lambda_1 \rangle$  is negative or not.

If it is negative,  $T(F(\bar{x}_T) + \psi(\bar{y}'_T) - F(x^*) - \psi(y^*)) \leq Diff$ .

If it is not negative, we need to bound it

$$\begin{aligned} & Diff + \frac{1}{\rho} \langle B^{-T}\nabla\psi(\bar{y}'_T), \lambda_T - \lambda_1 \rangle \\ & \leq Diff + \frac{1}{2\rho} (6\|B^{-T}\nabla\psi(\bar{y}'_T)\|_2^2 + \frac{1}{6}\|\lambda_T - \lambda_1\|_2^2) \\ & \leq Diff + \frac{3}{\rho} \|B^{-T}\nabla\psi(\bar{y}'_T)\|_2^2 + \frac{1}{4\rho} (\|\lambda_T - \lambda_{T+1}\|_2^2 + \|\lambda_{T+1}\|_2^2 + \|\lambda_1\|_2^2). \end{aligned} \quad (14)$$

Notice  $\frac{3}{\rho} \|B^{-T}\nabla\psi(\bar{y}'_T)\|_2^2$  can be bounded by our assumption.

Totally, we need to consider four cases.

**Case 1**  $N_T \leq 0, \langle B^{-T}\nabla\psi(\bar{y}'_T), \lambda_T - \lambda_1 \rangle \leq 0$ .

In this case,  $Diff \geq \sum_{t=1}^T \frac{\beta}{2} \|x_t - x^*\|_2^2$ .

Using the similar technique in the proof of Theorem 1, we have following condition with probability at least  $1 - 4\delta \ln T$ .

$$\frac{1}{2} Diff - (Reg - \frac{\beta}{4} \sum_{t=1}^T \|x_t - x^*\|_2^2) \leq \xi_t \leq \max\{2\sqrt{\frac{2L^2}{\beta}}(Diff), 6B\sqrt{\ln(1/\delta)}\}\sqrt{\ln(1/\delta)},$$

which implies

$$\frac{1}{2} Diff - (Reg - \frac{\beta}{4} \sum_{t=1}^T \|x_t - x^*\|_2^2) \leq \max\{2\sqrt{\frac{2L^2}{\beta}}(Diff), 6B\sqrt{\ln(1/\delta)}\}\sqrt{\ln(1/\delta)}. \quad (15)$$

Notice  $Reg - \frac{\beta}{4} \sum_{t=1}^T \|x_t - x^*\|_2^2$  is bounded by  $C_1 \ln T + C_2$  in Lemma 4 with  $\hat{\lambda} = 0$  ( $\sum_{t=1}^T \frac{\|\lambda_t - \lambda_{t+1}\|_2^2}{2\rho} + \frac{\|\lambda_{T+1}\|_2^2}{2\rho}$  is a positive term). Following similar steps in the proof of Theorem 1, we solve this inequality using Lemma A.2. Then we get  $Diff \leq C_3 \ln T + C_4$  with high probability. In this case  $T(F(\bar{x}_T) + \psi(\bar{y}'_T) - F(x^*) - \psi(y^*)) \leq Diff$ , thus  $F(\bar{x}_T) + \psi(\bar{y}'_T) - F(x^*) - \psi(y^*) \leq O(\frac{\ln T}{T})$  with high probability.

**Case 2**  $N_T \geq 0, \langle B^{-T}\nabla\psi(\bar{y}'_T), \lambda_T - \lambda_1 \rangle \leq 0$ .

We have following relation by (11) with probability at least  $1 - 4\delta \ln T$ .

$$\begin{aligned} & \frac{1}{2}(Diff + N_T) - (Reg - \frac{\beta}{4} \sum_{t=1}^T \|x_t - x^*\|_2^2 + \frac{N_T}{2}) \\ & \leq \max\{2\sqrt{\frac{2L^2}{\beta}}(Diff + N_T), 6B\sqrt{\ln(1/\delta)}\}\sqrt{\ln(1/\delta)}. \end{aligned} \quad (16)$$

Notice  $Reg - \frac{\beta}{4} \sum_{t=1}^T \|x_t - x^*\|_2^2 + \frac{N_T}{2}$  is bounded by  $C_1 \ln T + C_2$ , using the Lemma 4 and (12) with  $\hat{\lambda} = 0$ . Solve above inequality using Lemma A.2, we have

$Diff + N_T \leq C_3 \ln T + C_4$  with high probability which implies  $Diff \leq O(\ln T)$ . Since  $T(F(\bar{x}_T) + \psi(\bar{y}'_T) - F(x^*) - \psi(y^*)) \leq Diff$ , we have  $F(\bar{x}_T) + \psi(\bar{y}'_T) - F(x^*) - \psi(y^*) \leq O(\frac{\ln T}{T})$  with high probability.

**Case 3**  $N_T \leq 0, \langle B^{-T} \nabla \psi(\bar{y}'_T), \lambda_T - \lambda_1 \rangle \geq 0$ .

We have following relation with probability at least  $1 - 4\delta \ln T$ .

$$\begin{aligned} & \frac{1}{2}(Diff + N_T + \frac{1}{\rho} \langle B^{-T} \nabla \psi(\bar{y}'_T), \lambda_T - \lambda_1 \rangle) - (Reg - \frac{\beta}{4} \sum_{t=1}^T \|x_t - x^*\|_2^2 + \frac{1}{2\rho} \langle B^{-T} \nabla \psi(\bar{y}'_T), \lambda_T - \lambda_1 \rangle) \\ & \leq \max\{2\sqrt{\frac{2L^2}{\beta} (Diff)}, 6B\sqrt{\ln(1/\delta)}\} \sqrt{\ln(1/\delta)} \\ & \leq \max\{2\sqrt{\frac{2L^2}{\beta} (Diff + \frac{1}{\rho} \langle B^{-T} \nabla \psi(\bar{y}'_T), \lambda_T - \lambda_1 \rangle)}, 6B\sqrt{\ln(1/\delta)}\} \sqrt{\ln(1/\delta)}. \end{aligned} \tag{17}$$

$Reg - \frac{\beta}{4} \sum_{t=1}^T \|x_t - x^*\|_2^2 + \frac{1}{2\rho} \langle \nabla B^{-T} \psi(\bar{y}'_T), \lambda_T - \lambda_1 \rangle$  is bounded by  $C_1 \ln T + C_2$  by Lemma 4 and (14) with  $\hat{\lambda} = 0$ . We get  $Diff + \frac{1}{\rho} \langle B^{-T} \nabla \psi(\bar{y}'_T), \lambda_T - \lambda_1 \rangle \leq C_3 \ln T + C_4$  with high probability. Thus we have  $T(F(\bar{x}_T) + \psi(\bar{y}'_T) - F(x^*) - \psi(y^*)) \leq C_3 \ln T + C_4$  by (13).

**Case 4**  $N_T \geq 0, \langle B^{-T} \nabla \psi(\bar{y}'_T), \lambda_T - \lambda_1 \rangle \geq 0$

We have following relation with probability at least  $1 - 4\delta \ln T$ .

$$\begin{aligned} & \frac{1}{2}(Diff + N_T + \frac{1}{\rho} \langle B^{-T} \nabla \psi(\bar{y}'_T), \lambda_T - \lambda_1 \rangle) - (Reg - \frac{\beta}{4} \sum_{t=1}^T \|x_t - x^*\|_2^2 + \frac{N_T}{2} \\ & + \frac{1}{2\rho} \langle B^{-T} \nabla \psi(\bar{y}'_T), \lambda_T - \lambda_1 \rangle) \\ & \leq \max\{2\sqrt{\frac{2L^2}{\beta} (Diff + N_T)}, 6B\sqrt{\ln(1/\delta)}\} \sqrt{\ln(1/\delta)} \\ & \leq \max\{2\sqrt{\frac{2L^2}{\beta} (Diff + N_T + \frac{1}{\rho} \langle B^{-T} \nabla \psi(\bar{y}'_T), \lambda_T - \lambda_1 \rangle)}, 6B\sqrt{\ln(1/\delta)}\} \sqrt{\ln(1/\delta)}. \end{aligned} \tag{18}$$

Notice  $Reg - \frac{\beta}{4} \sum_{t=1}^T \|x_t - x^*\|_2^2 + \frac{N_T}{2} + \frac{1}{2\rho} \langle B^{-T} \nabla \psi(\bar{y}'_T), \lambda_T - \lambda_1 \rangle$  is bounded by  $C_1 \ln T + C_2$ , using Lemma 4, (12) and (14) with  $\hat{\lambda} = 0$ . Solve the inequality, we get  $Diff + N_T + \frac{1}{\rho} \langle B^{-T} \nabla \psi(\bar{y}'_T), \lambda_T - \lambda_1 \rangle \leq C_3 \ln T + C_4$  with high probability. Thus  $T(F(\bar{x}_T) + \psi(\bar{y}'_T) - F(x^*) - \psi(y^*)) \leq C_3 \ln T + C_4$  with high probability by (13) and the fact that  $N_T \geq 0$ .

In all cases, we have  $G(\bar{x}_T, \bar{y}'_T) - G(x^*, y^*) \leq O(\frac{\ln T}{T})$  with high probability, thus we finish our proof.  $\square$

## References

- [1] Sham M Kakade and Ambuj Tewari. On the generalization ability of online strongly convex programming algorithms. In *Advances in Neural Information Processing Systems*, pages 801–808, 2009.



- [2] Yu Nesterov. Smooth minimization of non-smooth functions. *Mathematical programming*, 103(1):127–152, 2005.
- [3] Taiji Suzuki. Dual averaging and proximal gradient descent for online alternating direction multiplier method. In *Proceedings of the 30th International Conference on Machine Learning*, pages 392–400, 2013.
